# Supplementary material
Source: publisher site journal article supplement (https://www.dovepress.com/article/557223)
Supplement: Supplementary file 1 [file 557223%20Supplementary%20Material.docx]

**SUPPLEMENTARY METHODS**

**Peripheral Blood Sample Processing**

Peripheral blood mononuclear cells (PBMCs) were isolated from peripheral blood samples anticoagulated with EDTA via the Ficoll density gradient centrifugation method. The resultant cell pellet was resuspended in 5 ml of precooled fluorescence - activated cell sorting (FACS) buffer (1× phosphate-buffered saline (PBS) supplemented with 0.5% bovine serum albumin). Subsequently, the suspension was centrifuged at 400 × g for 5 minutes at 4 °C. After discarding the supernatant, the cell pellet was resuspended in FACS buffer once more. For samples to be subjected to subsequent analysis, they should meet the following criteria: a minimum cell count of 3 × 106 and a viability of at least 85%. Following separation and counting, the cells were resuspended in pre - stored cryopreservation buffer (10% fetal bovine serum (FBS)+90% dimethyl sulfoxide (DMSO)), at a density ranging from 1-5 × 106/ mL. Then, the cells were gently agitated and transferred into a cryovial. The cryovials were then placed in a programmed cooling box and stored at -80 ℃ for a minimum of 4 hours before being transferred to liquid nitrogen for long - term storage. During the cell recovery process, the cryovials were thawed in a 37 ℃ water bath for 2 - 3 minutes. Once fully thawed, the cells were transferred to a 15 mL centrifuge tube within a biosafety cabinet. The cryovial was rinsed with 1 mL of complete culture medium, which was then added to the 15 mL centrifuge tube. The total volume was adjusted to 5 mL, and the conical tube was gently inverted to ensure thorough mixing. Subsequently, the cells were centrifuged at room temperature, washed, and resuspended using a FACS cytometer. The trypan blue exclusion assay was employed for cell counting and the assessment of cell viability.

**Cytometry by Time-of-Flight Analysis**

The following procedures were implemented for sample processing and analysis. A maximum of 3 × 106 cells per sample were processed. These cells were stained with 100 μL of 250 nM cisplatin (Fluidigm, South San Francisco, California, USA) for 5 minutes on ice to eliminate dead cells. Subsequently, the cells underwent washing using fluorescence - activated cell sorting (FACS), followed by treatment with a mixture of Fc receptor blocking solution and surface antibodies for 30 minutes on ice. FACS was then employed for cell purification, and Maxpar Fix and Perm Buffer containing 250 nM 191/193Ir (Fluidigm) was used for overnight fixation. After another round of FACS - mediated washing, the cells were incubated with intracellular antibodies for 30 minutes. Following an additional FACS purification step, the samples were resuspended in deionized water containing 10% EQ beads (Fluidigm), filtered through a 40 μm cell sieve, and then subjected to analysis using the CyTOF system (Helios, Fluidigm).

In terms of data processing, all sample data underwent rigorous de - barcoding and standardization. Fragmented and dead cells were manually removed using FlowJo software (FlowJo, Ashland, Oregon, USA), leaving only live single immune cells for further analysis. The unsupervised clustering algorithm of R v4.3.1 was applied to analyze all immune cells, and cell subsets were annotated based on the marker expression pattern of each subset in the "cluster vs marker" Heatmap generated by clustering. The t - distributed stochastic neighbor embedding (t-SNE) data dimensionality reduction algorithm was utilized for visualization purposes. Significance statistical analysis was performed to identify differential subgroups and markers among different groups.

**Single-cell RNA-sequencing**

The crude single-cell RNA sequencing (scRNA-seq) reads underwent barcode deduplication and alignment to the hg38 reference genome employing Cell Ranger v.3.1.0, yielding sparse digital count matrices. We subjected these matrices to analysis using Seurat v.4.0.0 to discern cell types and cellular states. Atypical cells were identified and expunged based on the following criteria: (1) mitochondrial content exceeding 20%, or (2) cells expressing fewer than 100 or more than 3,000 genes, contingent upon sample-level distributions.

The top 2,000 highly variable genes (HVGs) were culled from the normalized expression matrix, subjected to centering and scaling prior to the execution of principal component analysis (PCA) based on these HVGs. Putative doublets were expunged employing the DoubletFinder package (version 2.0.3) in R. To eliminate batch effects among experiments and samples, we leveraged canonical correlation analysis (CCA) to process our data and published datasets. Notably, the batch-corrected data were utilized exclusively for PCA and all other steps reliant on PCA. All other analyses, such as differential expression analysis, were predicated on the normalized data devoid of batch correction. CD14 and LYZ were harnessed as marker genes to segregate monocytes for further scrutiny.

**Flow Cytometric Analysis**

Each sample was lysed to obtain 1x106 cells, followed by Fc block incubation on ice for 20 minutes. Antigen-specific antibody mixes were prepared according to the antibody datasheet and incubated on ice for 30 minutes. Following cell washing with FACS buffer, the cells were analyzed using the Mindray flow cytometer, with collection of 200,000 events from peripheral blood. Monocytic populations or CD14+ monocytes were analyzed according to defined gating strategies.

**SUPPLEMENTARY FIGURES**

**
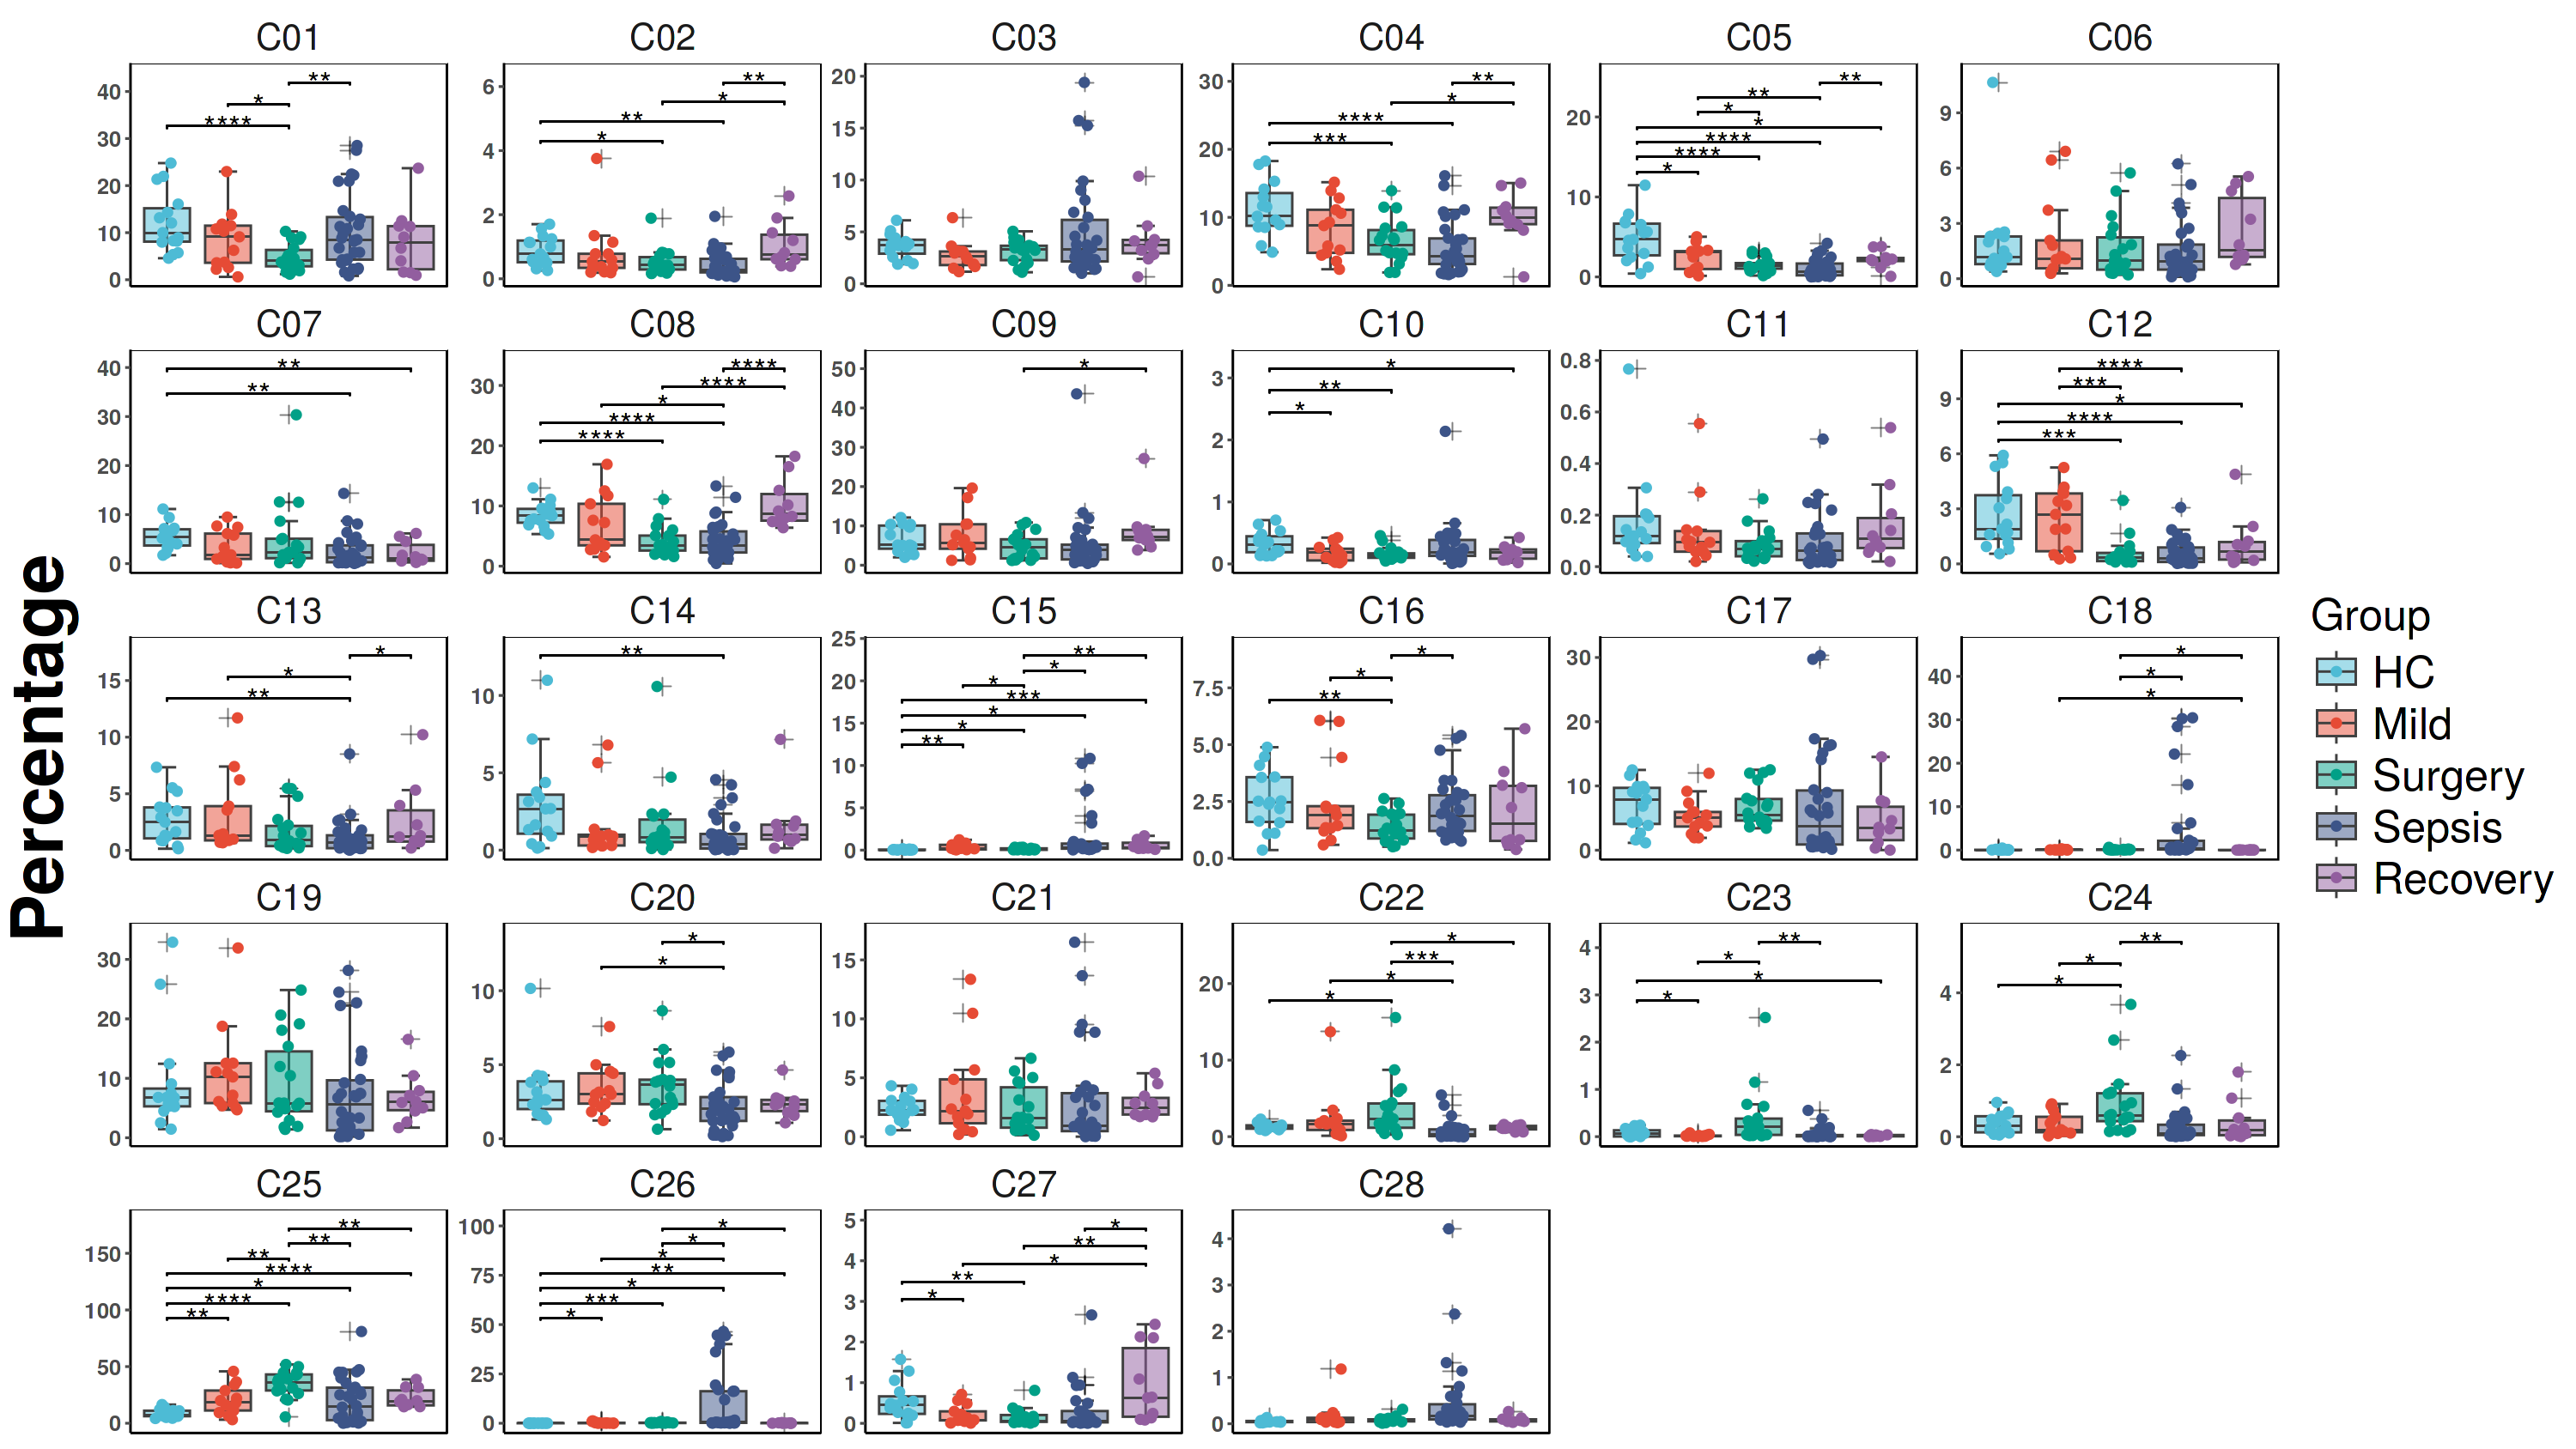
**

**Figure S1:** The percentages of 28 subpopulations divided by the detected 42 leukocyte markers in the peripheral blood samples by CyTOF. Statistical significance was denoted by *, *P* < 0.05; **, *P* < 0.01; ***, *P* < 0.001; ****, *P* < 0.0001.


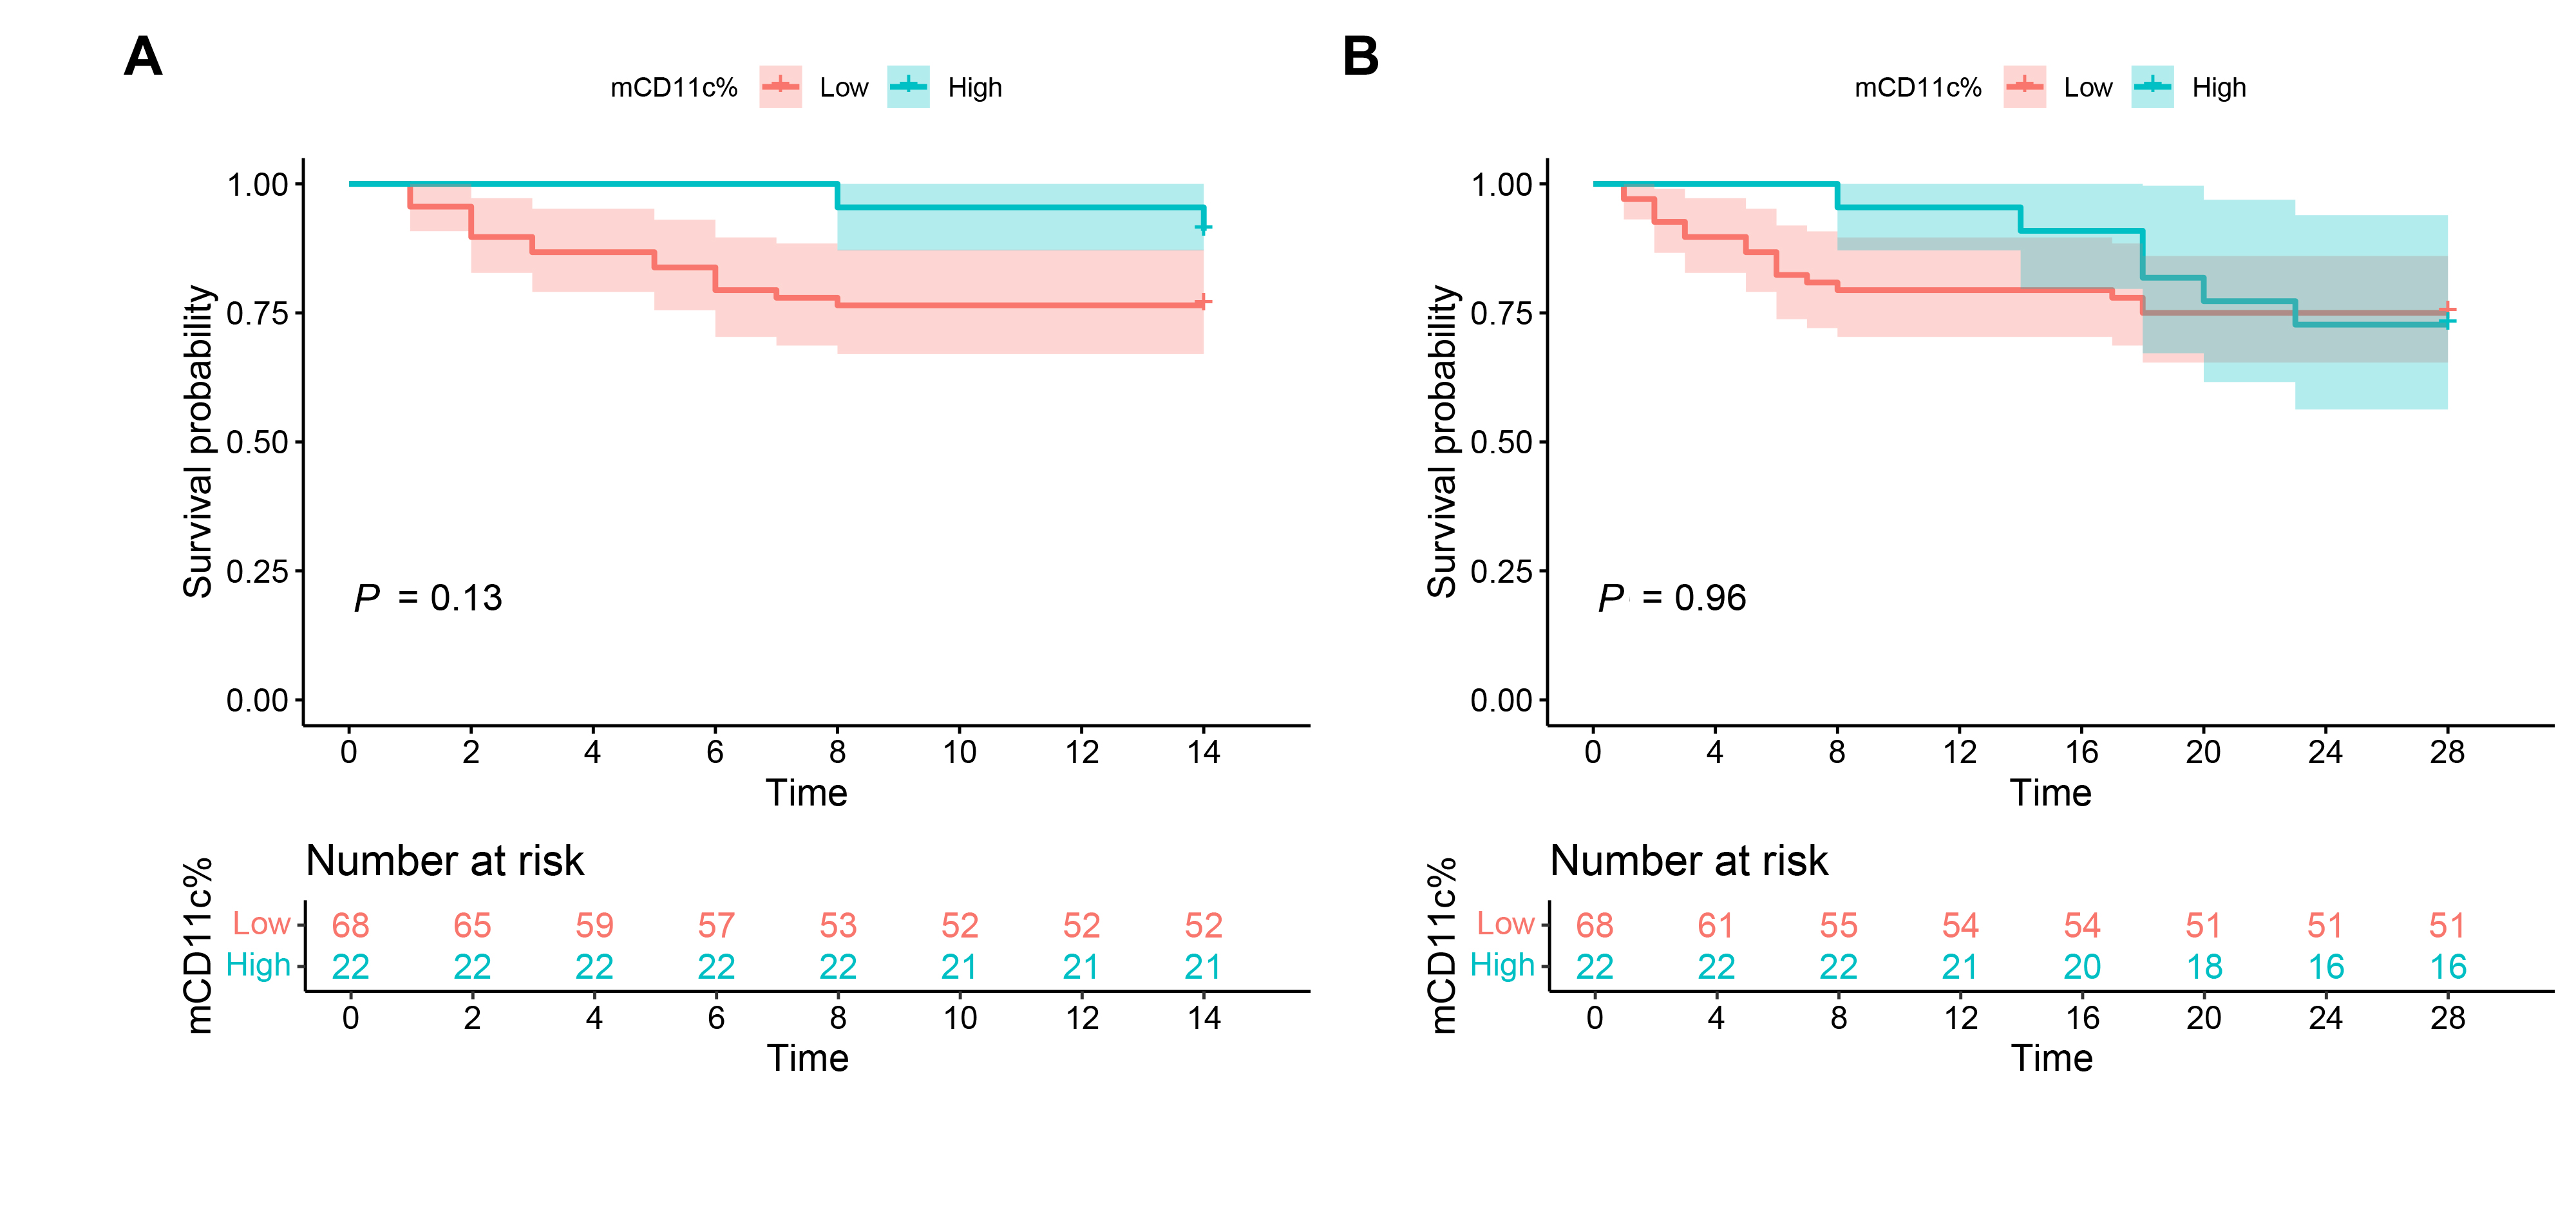


**Figure S2:** The 14-day (A) and 28-day (B) Kaplan-Meier Curve for the sepsis patients by mCD11c%. *P* values were calculated using log-Rank test. *P* < 0.05 means statistically significant.

**SUPPLEMENTARY TABLES**

Table S1 The antibody panel for CyTOF

| Label | Antibody | Clone | Vendor |
| --- | --- | --- | --- |
| 89Y | CD45 | HI30 | BioLegend |
| 115ln | CD3 | UCHT1 | BioXcell |
| 141Pr | CD56 | NCAM16.2 | BD |
| 142Nd | TCRγδ* | 5A6.E9 | Homemade |
| 142Nd | CD19 | HIB19 | BioLegend |
| 143Nd | CD27 | O323 | BioLegend |
| 144Nd | CD14 | M5E2 | BioLegend |
| 145Nd | IgD | IA6-2 | BioLegend |
| 146Nd | CD123 | 6H6 | BioLegend |
| 147Sm | IL-4 | MP4-25D2 | BioLegend |
| 148Nd | CD64 | 10.1 | BioLegend |
| 149Sm | CD25 | 24212 | RD |
| 150Nd | CD192(CCR2) | K036C2 | Bio Legend |
| 151Eu | CD172a | SE5A5 | BioLegend |
| 152Sm | CD39 | A1 | BioLegend |
| 153Eu | CD57 | HCD57 | BioLegend |
| 154Sm | Ki-67 | SolA15 | Thermo |
| 155Gd | CD45RA | HI100 | BioLegend |
| 156Gd | CD86 | Fun-1 | BD |
| 157Gd | CD28 | CD28.2 | BioXcell |
| 158Gd | IFNγ | B27 | BioLegend |
| 159Tb | CD11c | BU15 | BioLegend |
| 160Gd | CD33 | WM53 | BioLegend |
| 161Dy | CX3CR1 | K0124E1 | BioLegend |
| 162Dy | Foxp3 | PCH101 | Thermo |
| 163Dy | CD127 | A019D5 | BioLegend |
| 164Dy | CD185(CXCR5) | RF8B2 | BD |
| 165Ho | CD66b | G10F5 | BioLegend |
| 166Er | CD69 | FN50 | BioLegend |
| 167Er | CD197(CCR7) | G043H7 | BioLegend |
| 168Er | TREM2 | 237920 | RD |
| 169Tm | CD45RO | UCHL1 | BioLegend |
| 170Er | T-bet | 4B10 | BioLegend |
| 171Yb | CD279(PD1) | EH12.2H7 | BioLegend |
| 172Yb | CD38 | HIT2 | BioLegend |
| 173Yb | IL-17A | BL168 | BioLegend |
| 174Yb | CD20 | 2H7 | BioLegend |
| 175Lu | CD16 | 3G8 | BioLegend |
| 176Yb | HLA-DR | L243 | BioLegend |
| 197Au | CD4 | RPA-T4 | BioLegend |
| 198Pt | CD8a | RPA-T8 | BioLegend |
| 209Bi | CD11b | M1/70 | BioLegend |

* TCRγδ，T cell receptor γ/δ，a heterodimer consisting of a γ and δ chain.

Table S2 Baseline Characteristics of Patients

| **Variables** | **Discovery cohort** | | | | | **Validation cohort** | | |
| --- | --- | --- | --- | --- | --- | --- | --- | --- |
| **Sepsis** | **Mild** | **Surgery** | **Recovery** | **HC** | **Sepsis** | **Mild** | **Surgery** |
| Total  Male, n (%) | 30  19(63.3) | 13  9(69.2) | 18  12(66.7) | 10  6(60.0) | 15  9(60.0) | 90  66(73.3) | 77  46(59.7) | 100  50(50.0) |
| Age, median (IQR) | 67(62-76) | 48(39-61) | 56(43-63) | 65(36-76) | 52.5(46.25-57) | 69(63-76) | 69(61-76) | 63(55.8-70) |
| **underlying diseases** |  |  |  |  |  |  |  |  |
| Diabetes, n (%) | 9(30.00) | 0(0.00) | 0(0.00) | 5(50.00) | 1(10) | 20(22.2) | 11(14.3) | 5(5.0) |
| Hypertension, n (%) | 11(36.67) | 10(7.69) | 10(55.56) | 5(50.00) | 3(30) | 51(56.7) | 34(44.2) | 42(42.0) |
| Cardiovascular disease, n (%) | 5(16.67) | 0(0.00) | 18(100.0) | 2(20.00) | 0(0) | 20(22.2) | 15(19.5) | 100(100.0) |
| Chronic pulmonary disease, n (%) | 3(10.00) | 0(0.00) | 0(0.00) | 1(10.00) | 0(0) | 7(7.8) | 19(24.7) | 2(2.0) |
| **Infection site** |  |  |  |  |  |  |  |  |
| Bloodstream infection, n (%) | 8(26.67) | 1(7.69) | - | 10(50.00) | - | 18(20.0) | 0 | - |
| Respiratory tract infection, n (%) | 17(56.67) | 4(30.77) |  | 6(60.00) |  | 49(54.4) | 75(97.4) |  |
| Abdominal infection, n (%) | 17(56.67) | 7(53.85) |  | 3(30.00) |  | 24(30.0) | 1(1.3) |  |
| Urinary tract infection, n (%) | 8(26.67) | 2(15.38) |  | 3(30.00) |  | 13(14.4) | 1(1.3) |  |
| WBC (10E9/L), median (IQR) | 9.41(6.22-17.74) | 11.41(8.37-17.53) | 9.81(8.31-10.6) | 10.47(7.47-14.26) | 6.55(5.86-7.26) | 12.84(7.23-17.15) | 8.09(5.97-10.95) | 10.09(8.25-12.17) |
| CRP (mg/L), median (IQR) | 166.87(135.91-245.42) | 136.79(77.03-193.11) | 41.13(28.12-65.6) | 67.65(16.49-107.61) | 0.93(0.60-3.66) | 147.45(64.34-227.99) | 42.9(19.7-107) | 36.91(16.84-53.45) |
| PCT (ng/ml), median (IQR) | 17.15(11.2-67.0) | 0.27(0.14-1.72) | 0.7(0.39-2.47) | 0.36(0.17-2.87) | - | 6.4(1.27-35.09) | 0.12(0.07-0.45) | 0.39(0.17-1.2) |
| Creatinine (μmol/L), median (IQR) | 134(79-176) | 68(60-84) | 99.5(61-128) | 66.5(54-70) | 67.5(59.5-84.75) | 104.5(82.0-180.5) | 65(53-80.5) | 81(71-101.5) |
| ALT (U/L), median (IQR) | 31.5(17-56) | 19.5(14-29.5) | 16(11-30) | 30(13-49) | 18(14.25-33) | 22.5(14-55.75) | 24(13-40) | 16(12-23) |
| AST (U/L), median (IQR) | 43(26-90) | 21(16-25) | 34.5(23-93) | 25.5(13-33) | 18.5(17.25-20) | 42(20.25-81.25) | 22(16-38) | 42.5(28.75-59.5) |
| Total bilirubin (μmol/L), median (IQR) | 23.6(12.3-34.5) | 11.75(8.85-15.7) | 16.95(12.7-21.8) | 9.05(7.1-20.4) | 9.15(6.37-10.95) | 13.5(7.72-31.3) | 6.6(5.1-9.8) | 15.5(11.8-20.22) |
| SOFA, median (IQR) | 9.5(6-12) | - | 7(3-9) | - | - | 10(7-13) | - | 6(4-8) |
| APACHE II, median (IQR) | 20(11-24) | - | 14(11-17) | - | - | 21(16-26) | - | 13(11-15) |

Table S3 Univariate and Multivariate Cox regression analysis of 14-days mortality rate in sepsis patients

| **Index** | **Univariate Cox regression** | | | | **Multivariate Cox regression** | | | |
| --- | --- | --- | --- | --- | --- | --- | --- | --- |
| ***P*** | **HR** | **95% confidence interval (CI)** | | ***P*** | **HR** | **95% confidence interval (CI)** | |
| **Low** | **High** | **Low** | **High** |
| Gender | 0.787 | 0.867 | 0.309 | 2.433 |  |  |  |  |
| Age | 0.878 | 0.926 | 0.348 | 2.467 |  |  |  |  |
| Infection site  bloodstream infection  abdominal infection  respiratory tract infection  others | 0.851  0.174  0.055  0.111 | 1.113  1.932  0.383  2.218 | 0.366  0.748  0.144  0.832 | 3.381  4.985  1.021  5.911 |  |  |  |  |
| Pathogenic bacteria,  G+  G-  Fungus  Multiple pathogens | 0.938  0.076  0.857  0.488 | 1.040  0.392  0.903  0.675 | 0.390  0.140  0.297  0.222 | 2.771  1.101  2.744  2.051 |  |  |  |  |
| WBC (10E9/L) | 0.201 | 1.023 | 0.988 | 1.058 |  |  |  |  |
| NE (%) | 0.140 | 0.970 | 0.932 | 1.010 |  |  |  |  |
| CRP | 0.867 | 1.000 | 0.995 | 1.004 |  |  |  |  |
| PCT | 0.618 | 0.996 | 0.983 | 1.010 |  |  |  |  |
| mCD11c% | 0.001 | 0.870 | 0.800 | 0.947 | 0.102 | 0.923 | 0.837 | 1.016 |
| IL-6 | 0.239 | 1.000 | 1.000 | 1.000 |  |  |  |  |
| IL-10 | 0.558 | 0.999 | 0.998 | 1.001 |  |  |  |  |
| TNF-α | 0.681 | 0.974 | 0.862 | 1.102 |  |  |  |  |
| SOFA | 0.000 | 1.308 | 1.172 | 1.460 | 0.002 | 1.274 | 1.096 | 1.480 |
| APACHE II | 0.003 | 1.108 | 1.037 | 1.183 | 0.817 | 0.990 | 0.907 | 1.080 |

Table S4 Univariate and Multivariate Cox regression analysis of 28-day mortality rate in sepsis patients

| **Index** | **Univariate Cox regression** | | | | **Multivariate Cox regression** | | | |
| --- | --- | --- | --- | --- | --- | --- | --- | --- |
| ***P*** | **HR** | **95% confidence interval (CI)** | | ***P*** | **HR** | **95% confidence interval (CI)** | |
| **Low** | **High** | **Low** | **High** |
| Gender | 0.863 | 0.921 | 0.363 | 2.337 |  |  |  |  |
| Age | 0.046 | 3.441 | 1.022 | 11.583 | 0.189 | 2.285 | 0.665 | 7.847 |
| Infection site  bloodstream infection  abdominal infection  respiratory tract infection  others | 0.438  0.539  0.725  0.711 | 1.445  1.321  0.864  1.206 | 0.570  0.543  0.381  0.448 | 3.667  3.212  1.957  3.250 |  |  |  |  |
| Pathogenic bacteria,  G+  G-  Fungus  Multiple pathogens | 0.527  0.139  0.180  0.543 | 0.740  0.523  1.799  1.305 | 0.292  0.222  0.762  0.553 | 1.878  1.235  4.245  3.079 |  |  |  |  |
| WBC | 0.235 | 1.019 | 0.988 | 1.052 |  |  |  |  |
| NE% | 0.497 | 0.983 | 0.936 | 1.033 |  |  |  |  |
| CRP | 0.432 | 0.998 | 0.994 | 1.003 |  |  |  |  |
| PCT | 0.311 | 0.993 | 0.981 | 1.006 |  |  |  |  |
| mCD11c% | 0.004 | 0.895 | 0.829 | 0.966 | 0.110 | 0.931 | 0.853 | 1.016 |
| IL-6 | 0.052 | 1.000 | 1.000 | 1.000 |  |  |  |  |
| IL-10 | 0.841 | 1.000 | 0.999 | 1.001 |  |  |  |  |
| TNF-α | 0.641 | 0.981 | 0.907 | 1.062 |  |  |  |  |
| SOFA | 0.000 | 1.264 | 1.145 | 1.397 | 0.066 | 1.128 | 0.992 | 1.282 |
| APACHE II | 0.000 | 1.144 | 1.075 | 1.219 | 0.068 | 1.077 | 0.994 | 1.167 |
